# Supplementary material
Source: PubMed Central journal article supplement (PMC8958355)
Supplement: NIHMS1788222-supplement-ic61-37_SI_Oloo.pdf [file NIHMS1788222-supplement-ic61-37_SI_Oloo.pdf]

Supporting Information for

## **A Nonheme Diiron Oxygenase Mimic That Generates a Diferric-Peroxo Intermediate Capable of Catalytic Olefin Epoxidation and Alkane Hydroxylation Including Cyclohexane**

Williamson N. Oloo,<sup>a</sup> Miklós Szávuly,<sup>b</sup> József Kaizer<sup>#,b</sup> and Lawrence Que, Jr.<sup>‡,a</sup>

<sup>a</sup>Department of Chemistry, University of Minnesota, 207 Pleasant St. SE, Minneapolis, MN 55455, United States

<sup>b</sup>Research Group of Bioorganic and Biocoordination Chemistry, University of Pannonia, 8200 Veszprém, Hungary

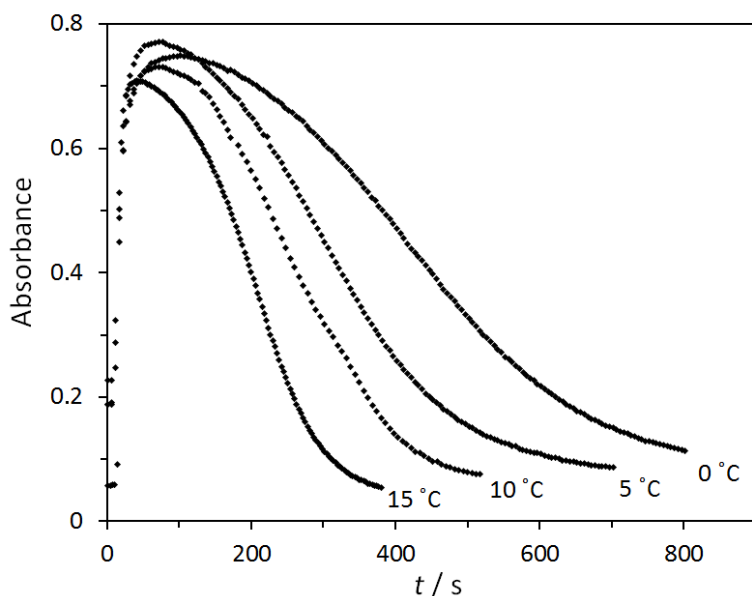

**Figure S1.** Temperature-dependent stability of **2**.  $[1]_0 = 10^{-3}$  M, in MeCN at 690 nm.

## Materials

All manipulations were performed under a pure argon atmosphere using standard Schlenk-type inert-gas techniques unless otherwise stated. Solvents used for the reactions were purified by standard methods and stored under argon. Iron(II) perchlorate was purchased from commercial sources. The ligand 1,3-bis(2'-pyridylimino)isoindoline (indH) was prepared according to published procedures.<sup>10a</sup>

## Analytical and physical measurements

UV-vis spectra were recorded on an Agilent 8453 diode-array spectrophotometer using quartz cells. GC analyses were performed on an Agilent 7820A gas chromatograph equipped with a flame ionization detector and a 30 m HP-5. GC-MS analyses were carried out on a Shimadzu QP2010SE instrument equipped with a secondary electron multiplier detector with conversion dynode and a 30 m HP-5MS column.

## Stoichiometric oxidation of cyclohexanone with **2**

Reactions were carried out by mixing the substrate (cyclohexanone) with complex **[1]** ( $10^{-3}$  M) in 1.5 ml acetonitrile and then adding 4 equiv.  $H_2O_2$  at different temperatures (0, 5, 10, 15 °C). The reactions were then followed by UV-Vis spectroscopy at 680 nm.

**Table S1.** Kinetic data for the oxidation of cyclohexanone with **2**

| T<br>°C | [1]<br>(10 <sup>-3</sup> M) | [cyclohexanone] <sub>0</sub><br>(M) | <i>k</i> <sub>obs</sub><br>(10 <sup>-2</sup> s <sup>-1</sup> ) | <i>k</i> <sub>2</sub> <sup>a</sup><br>(M <sup>-1</sup> s <sup>-1</sup> ) |
|---------|-----------------------------|-------------------------------------|----------------------------------------------------------------|--------------------------------------------------------------------------|
| 5       | 1                           | 0.05                                | 1.92±0.06                                                      | 0.4±0.01                                                                 |
| 5       | 1                           | 0.075                               | 3.15±0.13                                                      | 0.38±0.02                                                                |
| 5       | 1                           | 0.15                                | 5.91±0.18                                                      | 0.36±0.01                                                                |
| 5       | 1                           | 0.2                                 | 8.28±0.4                                                       | 0.4±0.02                                                                 |
| 5       | 1                           | 0.075                               | 3.15±0.06                                                      | 0.4±0.01                                                                 |
| 5       | 1.5                         | 0.075                               | 2.97±0.05                                                      | 0.34±0.02                                                                |
| 5       | 2                           | 0.075                               | 2.72±0.04                                                      | 0.36±0.01                                                                |
| 5       | 2.5                         | 0.075                               | 2.93±0.06                                                      | 0.37±0.02                                                                |
| 0       | 1.0                         | 0.075                               | 2.6±0.07                                                       | 0.3±0.01                                                                 |
| 10      | 1                           | 0.075                               | 4.2±0.15                                                       | 0.51±0.03                                                                |
| 15      | 1                           | 0.075                               | 5.1±0.16                                                       | 0.6±0.02                                                                 |

<sup>a</sup>  $V = k_{obs} \times [2], k_2 = (k_{obs} - k_0) / [\text{Substrate}]$

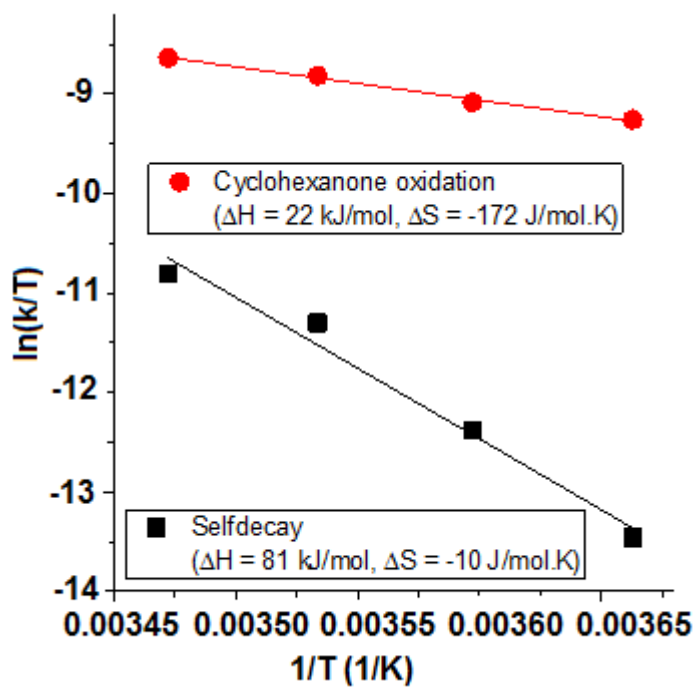

**Figure S2a.** Eyring plots for the self-decay of **2** (black squares) and the reaction of **2** with cyclohexanone (red circles).

### BVO-product (caprolactone)

#### Library:

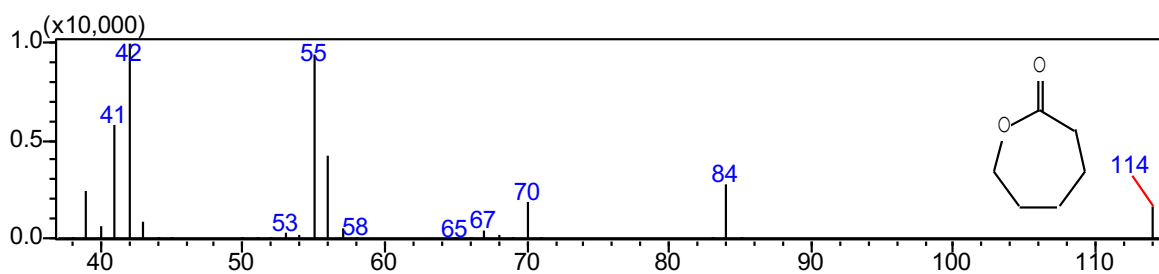

#### Measured:

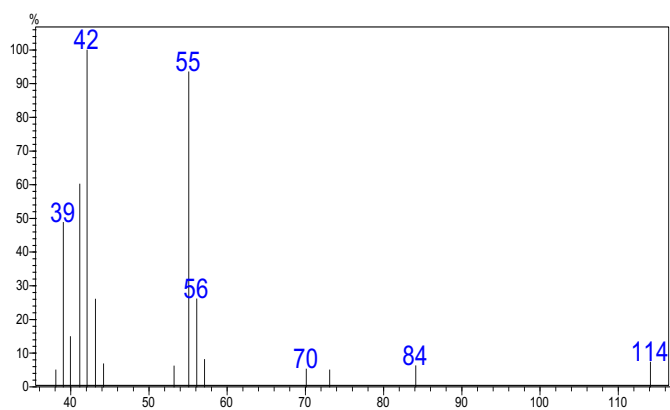

| m/z    | Absolute Intensity | Relative Intensity |
|--------|--------------------|--------------------|
| 38.1   | 5540               | 6.99               |
| 39.1   | 45422              | 57.35              |
| 40.1   | 10900              | 13.76              |
| 41.15  | 54526              | 68.84              |
| 42.15  | 79207              | 100                |
| 43.2   | 6818               | 8.61               |
| 51.15  | 2943               | 3.72               |
| 53.15  | 6974               | 8.8                |
| 55.15  | 71335              | 90.06              |
| 56.15  | 22697              | 28.66              |
| 57.1   | 4006               | 5.06               |
| 70.2   | 6953               | 8.78               |
| 84.2   | 6164               | 7.78               |
| 114.15 | 4183               | 5.28               |

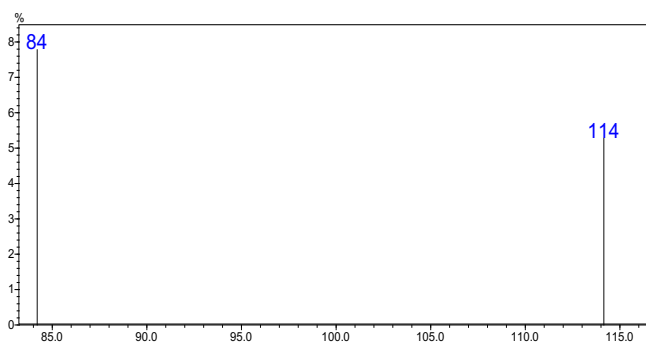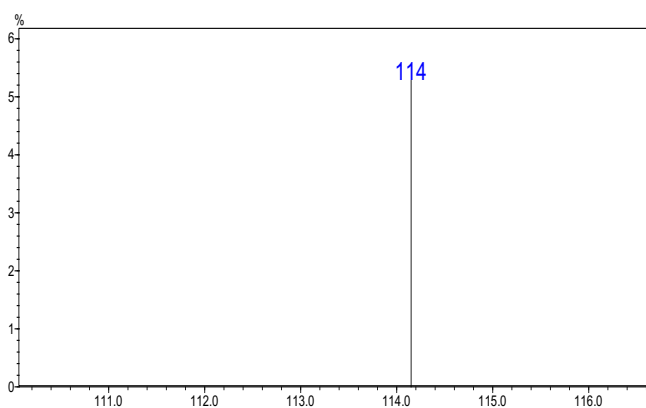

**Figure S2b:** Mass spectral data for the Baeyer-Villager oxidation product (caprolactone) obtained by carrying out the reaction in the presence of  $\text{H}_2^{18}\text{O}$ , showing no  $^{18}\text{O}$  label incorporation into the molecular ion peak at m/z 114

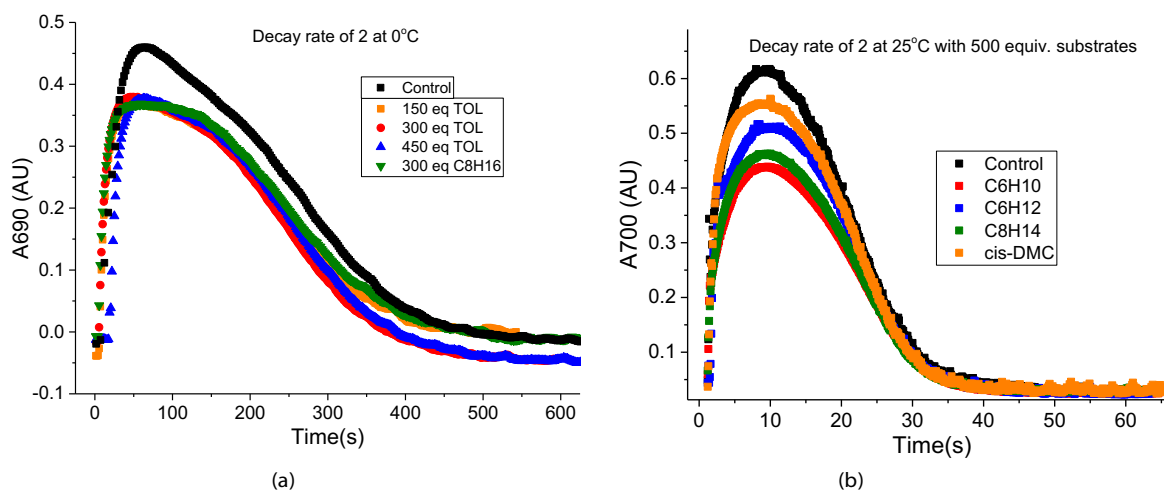

**Figure S3.** Time traces for the formation and decay of **2** in the presence of various substrates. Intermediate **2** was generated from the reaction of 1 mM **1** and either 4 equiv.  $\text{H}_2\text{O}_2$  at 0 °C (a), or 25 equiv.  $\text{H}_2\text{O}_2$  at 25 °C (b).

**Table S2:** Kinetic data for hydrocarbon oxidations by **1** at 25 °C in MeCN.

| Substrate                                                       | [ <b>2</b> ] <sup>a</sup><br>(10 <sup>-3</sup> M) | [H <sub>2</sub> O <sub>2</sub> ]<br>(M) | [Substrate]<br>(M) | <sup>b</sup> k <sub>obs</sub><br>(10 <sup>-6</sup> s <sup>-1</sup> ) | <sup>b</sup> k <sub>3</sub><br>(M <sup>-2</sup> s <sup>-1</sup> ) | V <sup>c</sup><br>(10 <sup>-7</sup> M s <sup>-1</sup> ) |
|-----------------------------------------------------------------|---------------------------------------------------|-----------------------------------------|--------------------|----------------------------------------------------------------------|-------------------------------------------------------------------|---------------------------------------------------------|
| <b>DHA</b>                                                      | 0.05                                              | 0.025                                   | 0.1                | 13.5                                                                 | 10.8                                                              | 13.50                                                   |
|                                                                 | 0.05                                              | 0.05                                    | 0.1                | 24.6                                                                 | 9.84                                                              | 24.60                                                   |
|                                                                 | 0.05                                              | 0.1                                     | 0.1                | 47.8                                                                 | 9.56                                                              | 47.80                                                   |
|                                                                 | 0.05                                              | 0.025                                   | 0.01               | 15.9                                                                 | 12.72                                                             | 1.59                                                    |
|                                                                 | 0.05                                              | 0.025                                   | 0.025              | 16.1                                                                 | 12.88                                                             | 4.03                                                    |
|                                                                 | 0.05                                              | 0.025                                   | 0.053              | 16.1                                                                 | 12.88                                                             | 8.53                                                    |
|                                                                 | 0.05                                              | 0.025                                   | 0.075              | 15.8                                                                 | 12.64                                                             | 11.85                                                   |
| <b>Fluorene</b>                                                 | 0.05                                              | 0.025                                   | 0.1                | 6.6                                                                  | 5.28                                                              | 6.60                                                    |
|                                                                 | 0.05                                              | 0.05                                    | 0.1                | 15.2                                                                 | 6.08                                                              | 15.20                                                   |
|                                                                 | 0.05                                              | 0.1                                     | 0.1                | 29.4                                                                 | 5.88                                                              | 29.40                                                   |
| <b>(C<sub>6</sub>H<sub>5</sub>)<sub>3</sub>CH</b>               | 0.05                                              | 0.025                                   | 0.1                | 3.86                                                                 | 3.09                                                              | 3.86                                                    |
|                                                                 | 0.05                                              | 0.05                                    | 0.1                | 5.61                                                                 | 2.24                                                              | 5.61                                                    |
| <b>C<sub>6</sub>H<sub>5</sub>CH(CH<sub>3</sub>)<sub>2</sub></b> | 0.05                                              | 0.1                                     | 0.1                | 14.4                                                                 | 2.88                                                              | 14.40                                                   |
|                                                                 | 0.05                                              | 0.025                                   | 0.1                | 2.64                                                                 | 2.11                                                              | 2.64                                                    |
|                                                                 | 0.05                                              | 0.05                                    | 0.1                | 5.58                                                                 | 2.23                                                              | 5.58                                                    |
|                                                                 | 0.05                                              | 0.1                                     | 0.1                | 10.8                                                                 | 2.16                                                              | 10.80                                                   |
|                                                                 | 0.05                                              | 0.025                                   | 0.05               | 2.54                                                                 | 2.03                                                              | 1.27                                                    |
|                                                                 | 0.05                                              | 0.025                                   | 0.075              | 2.55                                                                 | 2.04                                                              | 1.91                                                    |
|                                                                 | 0.05                                              | 0.025                                   | 0.125              | 2.55                                                                 | 2.04                                                              | 3.19                                                    |
| <b>C<sub>6</sub>H<sub>5</sub>CH<sub>2</sub>CH<sub>3</sub></b>   | 0.05                                              | 0.025                                   | 0.15               | 2.25                                                                 | 1.80                                                              | 3.38                                                    |
|                                                                 | 0.05                                              | 0.025                                   | 0.1                | 0.72                                                                 | 0.58                                                              | 0.72                                                    |
|                                                                 | 0.05                                              | 0.05                                    | 0.1                | 1.63                                                                 | 0.65                                                              | 1.63                                                    |
|                                                                 | 0.05                                              | 0.1                                     | 0.1                | 3.72                                                                 | 0.74                                                              | 3.72                                                    |
|                                                                 | 0.05                                              | 0.025                                   | 0.1                | 0.45                                                                 | 0.36                                                              | 0.45                                                    |
| <b>C<sub>6</sub>H<sub>5</sub>CH<sub>3</sub></b>                 | 0.025                                             | 0.025                                   | 0.1                | 0.21                                                                 | 0.34                                                              | 0.21                                                    |
|                                                                 | 0.075                                             | 0.025                                   | 0.1                | 0.59                                                                 | 0.32                                                              | 0.59                                                    |
|                                                                 | 0.10                                              | 0.025                                   | 0.1                | 0.85                                                                 | 0.34                                                              | 0.85                                                    |
|                                                                 | 0.05                                              | 0.05                                    | 0.1                | 0.88                                                                 | 0.35                                                              | 0.88                                                    |
|                                                                 | 0.05                                              | 0.1                                     | 0.1                | 1.62                                                                 | 0.32                                                              | 1.62                                                    |
| <b>C<sub>6</sub>H<sub>5</sub>CH<sub>3</sub></b>                 | 0.05                                              | 0.025                                   | 0.05               | 0.52                                                                 | 0.42                                                              | 0.26                                                    |
|                                                                 | 0.05                                              | 0.025                                   | 0.075              | 0.45                                                                 | 0.36                                                              | 0.34                                                    |
|                                                                 | 0.05                                              | 0.025                                   | 0.125              | 0.45                                                                 | 0.36                                                              | 0.56                                                    |
|                                                                 | 0.05                                              | 0.025                                   | 0.15               | 0.49                                                                 | 0.39                                                              | 0.74                                                    |
|                                                                 | 0.05                                              | 0.025                                   | 0.1                | 0.23                                                                 | 0.18                                                              | 0.23                                                    |
|                                                                 | 0.05                                              | 0.05                                    | 0.1                | 0.45                                                                 | 0.18                                                              | 0.45                                                    |
|                                                                 | 0.05                                              | 0.1                                     | 0.1                | 0.9                                                                  | 0.18                                                              | 0.90                                                    |
| <b>C<sub>8</sub>H<sub>16</sub></b>                              | 0.05                                              | 0.025                                   | 0.1                | 0.27                                                                 | 0.22                                                              | 0.27                                                    |
|                                                                 | 0.05                                              | 0.05                                    | 0.1                | 0.59                                                                 | 0.24                                                              | 0.59                                                    |
| <b>C<sub>6</sub>H<sub>5</sub>CH<sub>3</sub></b>                 | 0.05                                              | 0.1                                     | 0.1                | 1.23                                                                 | 0.25                                                              | 1.23                                                    |
|                                                                 | 0.5                                               | 0.25                                    | 0.1                | 46.4                                                                 | 0.37                                                              | 46.4 (KIE)                                              |
|                                                                 | 0.5                                               | 0.25                                    | 0.1                | 1.24                                                                 | 0.01                                                              | 1.24 (KIE)                                              |

<sup>a</sup> Generated in situ from complex **1**

<sup>b</sup> Normalized with the number of equivalent C-H bonds (*n*) on the substrate

<sup>c</sup>  $V = k_{obs} \times [S]$ ;  $k_{obs}$  was extracted from a plot of  $\ln[\text{substrate}]_t$  (calculated as  $[\text{substrate}]_t = [\text{substrate}]_0 - [\text{product}]_t$ ) vs. time and normalized with the number of hydrogens that could be cleaved.

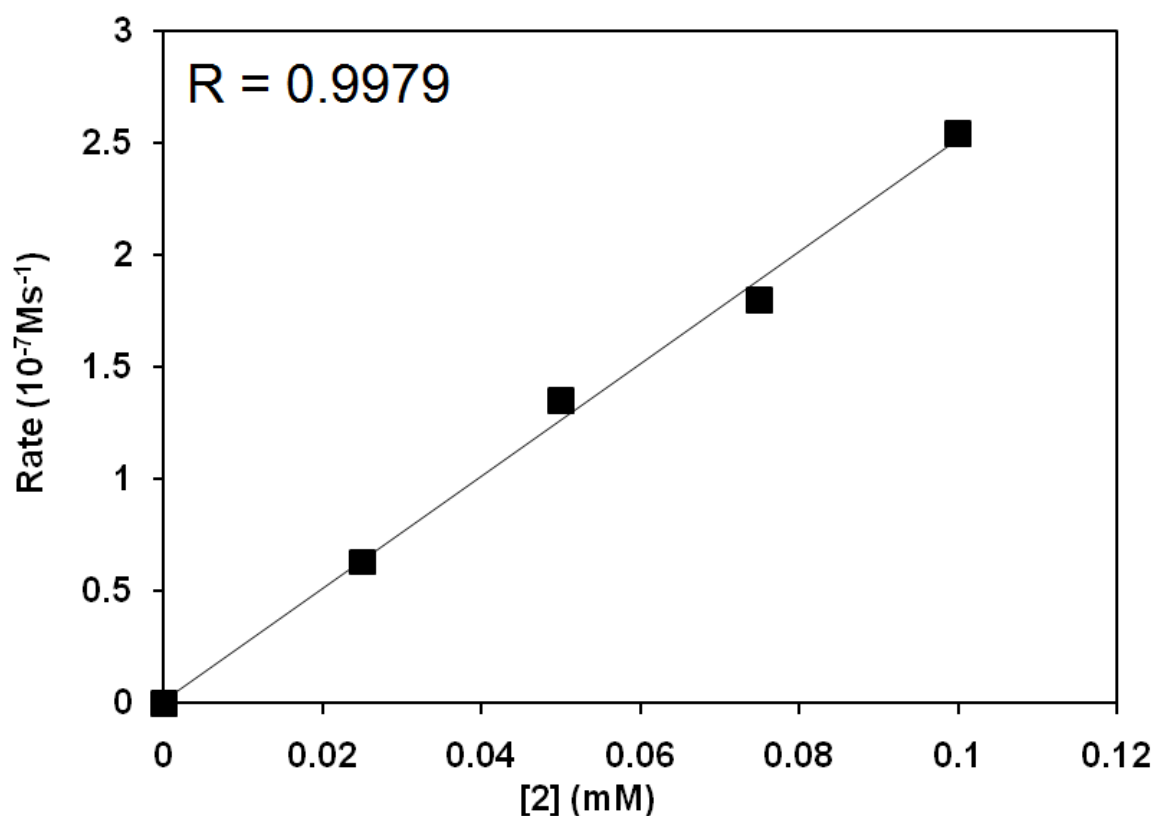

**Figure S4.** The rate of the catalytic oxidation of toluene plotted against the initial concentration of **2** (0.025-0.1 mM **2**, 0.1 M toluene, 0.025 M H<sub>2</sub>O<sub>2</sub>, 25 °C, acetonitrile), showing that the reaction rate increases proportionally to [catalyst].



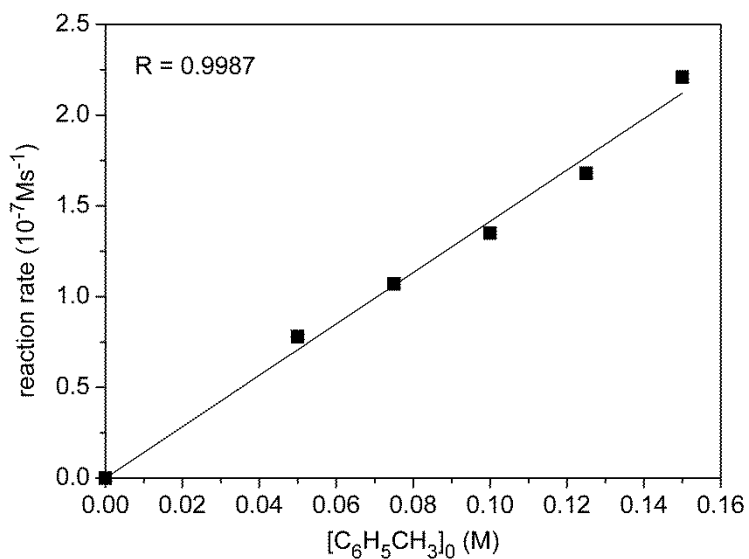

**Figure S5.** The rates of the catalytic oxidation of toluene plotted against the initial concentration of toluene (0.05 mM **2**, 0.05-0.15 M toluene, 0.025 M H<sub>2</sub>O<sub>2</sub>, 25 °C, acetonitrile), showing that the reaction rate increases proportionally to [toluene]

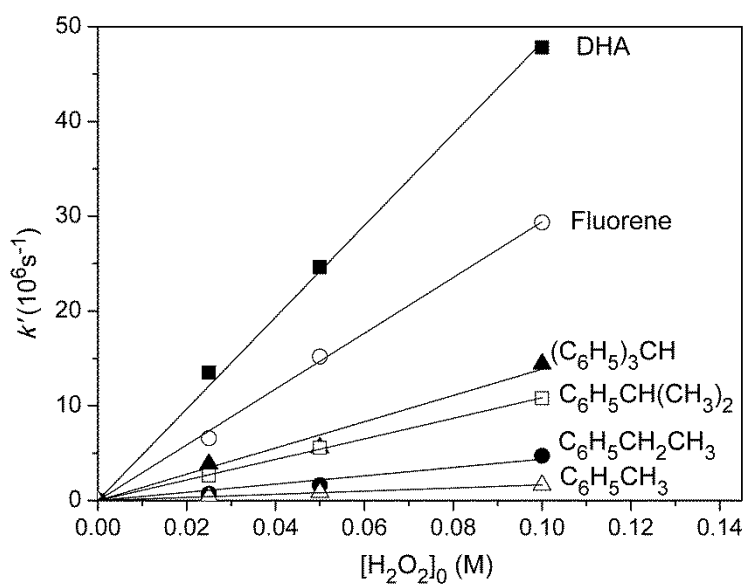

**Figure S6.** The dependence of  $k'$  on the initial hydrogen peroxide concentrations for the different C–H substrates (0.05 mM **2**, 0.1 M substrate, 0.025 M H<sub>2</sub>O<sub>2</sub>, 25 °C, acetonitrile).

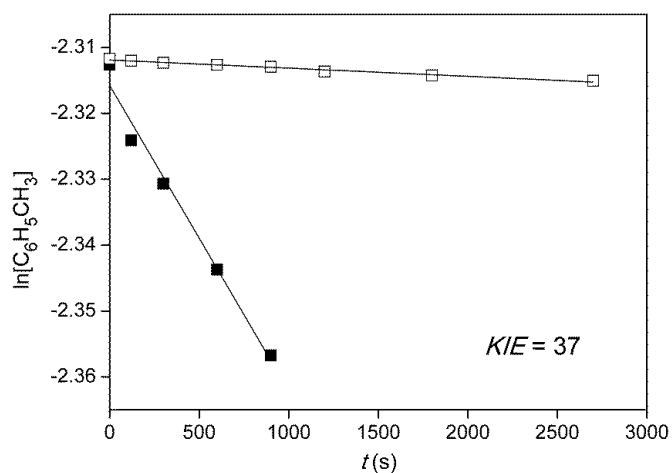

**Figure S7.** Difference between the reaction rates for toluene and  $d^8$ -toluene oxidation under identical conditions (1mM **1**, 0.1 M toluene, 0.25 M  $H_2O_2$ , 25 °C, acetonitrile).

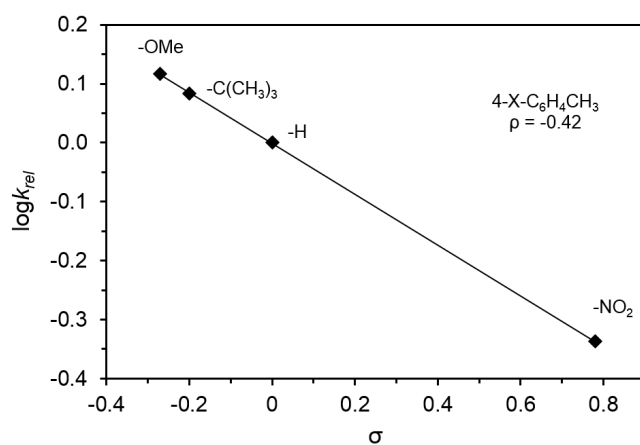

**Fig. S8.** Hammett plot for the catalytic oxidation of *para*-substituted toluenes. The  $k_{rel}$  values were: X = H, 1.00; X = OMe, 1.31; X = C(CH<sub>3</sub>)<sub>3</sub>, 1.21; X = NO<sub>2</sub>, 0.46. Reaction conditions: substrates (1.0 mmol), **1** (0.01 mmol),  $H_2O_2$  (2.5 mmol) in 10 mL acetonitrile under Ar at 25 °C.

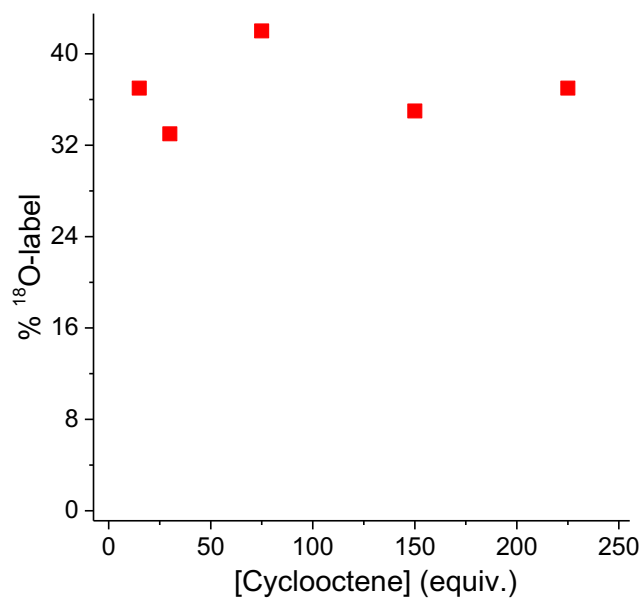

**Figure S9.** <sup>18</sup>O labelling of cyclooctene oxide in the oxidation of cyclooctene by 4 mM **1** and 5 equiv. H<sub>2</sub>O<sub>2</sub> in the presence of H<sub>2</sub><sup>18</sup>O (250 equiv.) at 25 °C. The amounts of added cyclooctene (relative to [Fe<sup>II</sup>]) were varied.

---
